# Supplementary material
Source: publisher figshare collection journal article supplement (https://acs.figshare.com/ndownloader/files/11402249)
Supplement: Supplementary file 1 [file 11402249]

## Supporting Information

# Biocompatible and stable GO-coated Fe<sub>3</sub>O<sub>4</sub> nanocomposite: A robust drug delivery carrier for simultaneous tumor MR imaging and target therapy

## All authors

*Dong Li<sup>†1</sup>; Mingwu Deng<sup>‡1</sup>; Ziyu Yu<sup>1</sup>, Wei Liu<sup>1</sup>, Guangdong Zhou<sup>1</sup>, Wei Li<sup>1</sup>,  
Xiansong Wang<sup>\*1</sup>; Dapeng Yang<sup>\*2</sup>; Wenjie Zhang<sup>\*1</sup>*

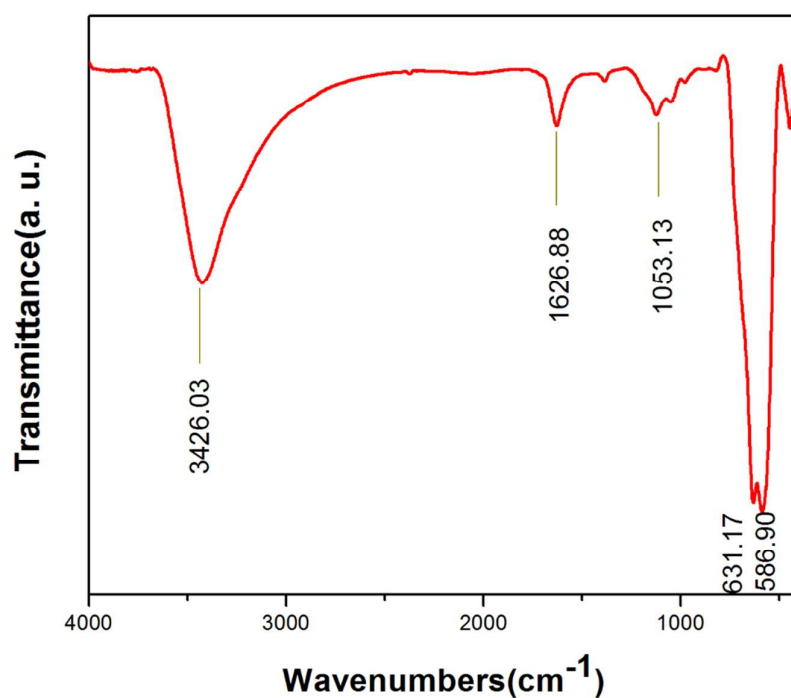

Figure S1 Fourier transform infrared spectroscopy (FT-IR) characterization was adopted to examine the conformation of Fe<sub>3</sub>O<sub>4</sub>@nGO NPs.

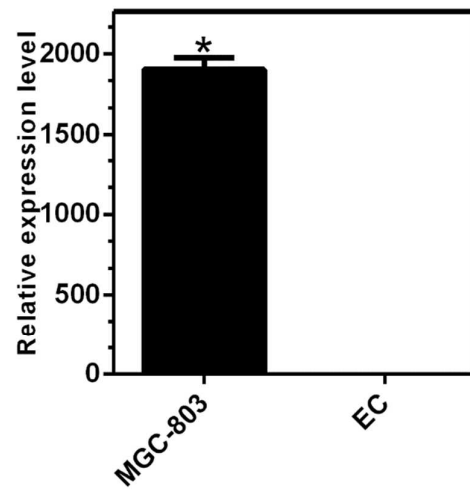

Figure S2 The relative expression level of FR in both MGC-803 cells and EC detected by qRT-PCR.
